# Supplementary material for: Stakeholders' insights and perceptions on nursing and midwifery care providers' pre-service education, training, and regulations in Senegal: a mixed-methods study
Source: Research Square preprint supplement (doi:10.21203/rs.3.rs-7643871/v1), 2025-10-29
Supplement: Supplementary file 1 [file 163d7099171c9123c8c58109.docx]

# Supplementary Information

**Figures**

[Supplementary Figure 1: List of technical working group organizations 2](#_Toc208318910)

[Supplementary Figure 2: In depth interview guides 2](#_Toc208318911)

[Supplementary Figure 3: Consent form 11](#_Toc208318918)

[Supplementary Figure 4: Survey questions 15](#_Toc208318919)

[Supplementary Figure 5: Additional Quotes 20](#_Toc208318920)

**Tables**

[Supplementary Table 1: Curricula assessment score of five pre-service education programs mapped against the 2019 ICM Competencies in “care during labour and birth” category 25](#_Toc208318924)

[Supplementary Table 2: Survey Results 27](#_Toc208318925)

# Supplementary Figure 1: List of technical working group organizations

Senegal Ministry of Health and Social Action, United Nations Population Fund (UNFPA), World Health Organization (WHO), United Nations Children's Fund (UNICEF), United States Agency for International Development (USAID), Japan International Cooperation Agency (JICA), Korea International Cooperation Agency (KOICA), World Bank, Centre de Formation et de Recherche en Santé de la Reproduction (Center for Training and Research in Reproductive Health (CEFOREP), the Chair of Pediatrics and the Chair of Obstetrics at the University of Dakar, National Association of Obstetrician and Gynaecologists, National Association of State Midwives of Senegal and State Nurses of Senegal and Regional Health Directorates representatives were consulted and provided technical advise during the study.

# Supplementary Figure 2: In depth interview guides

### Questionnaire 1: (DSME, Coordonatrice SR Niveau regional et national)

*Ce guide d'entretien est spécifique au personnel travaillant sur la santé maternelle et néonatale au sein du ministère de la Santé (par exemple, le chef infirmier/sage-femme ou autre personnel du ministère de la Santé)*

Nom de l’intervieweur : ________________________________________
Date : _____________________________________________________
Nom de la personne interrogée : ________________________________________

Affiliation de la personne interrogée : _______________________________________

**Expliquer les objectifs de l'entretien**

Expliquez les objectifs de l'entretien et présentez-vous (membre du projet). "Bonjour/après-midi, je suis ____________ (présentez-vous)".

« Nous travaillons sur un projet lié à la mesure du personnel de santé qualifié fournissant des soins à l'accouchement selon la nouvelle définition qui a été publiée en 2018, mais un cadre de mesure n'a pas encore été développé.
La Définition du personnel de santé qualifié de 2018 indique clairement le niveau de compétence attendu d'un prestataire de soins de santé qualifié de « personnel de santé qualifié ». L'importance d'une formation initiale et continue de qualité, de la réglementation et des licences, d'un environnement favorable, de systèmes d'orientation et du travail d'équipe est précisée (une copie du cadre de définition 2018 doit être partagée dans l'invitation par e- mail à participer à cet entretien).

Cet entretien est mené pour obtenir votre avis sur les aspects liés au personnel de santé qualifié fournissant des soins à l'accouchement au (Népal, Sénégal et Zambie - supprimer la mention inutile). Je suis particulièrement intéressé par :

- Votre rôle et vos responsabilités liés à la formation initiale et continue des prestataires de soins de santé assurant l'accouchement.
- Votre rôle et vos responsabilités liés à la planification, à la répartition et au développement du personnel de santé (par exemple, opportunités de formation et avancement professionnel).
  Les informations tirées de l'entretien aideront à éclairer la manière dont les concepts de la Définition 2018 peuvent être mesurés
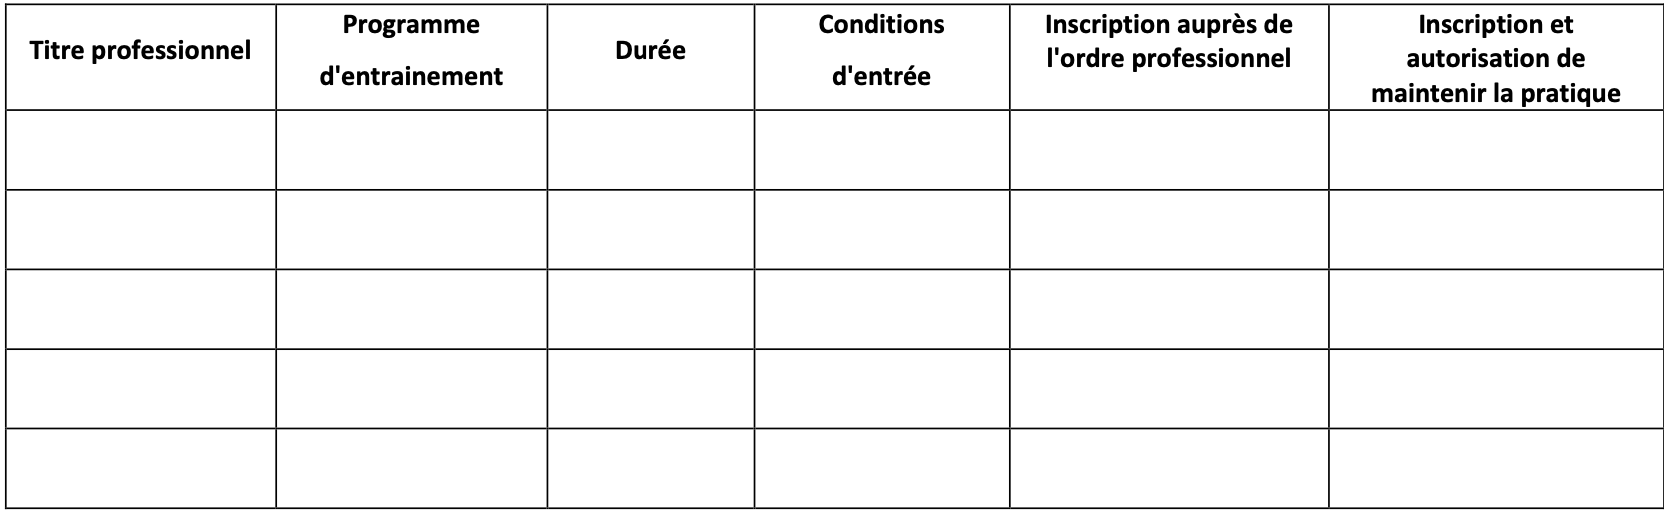
dans le contexte du Népal/Sénégal/Zambie ».
- J'aimerais commencer par vous demander de décrire brièvement votre rôle et vos responsabilités par rapport aux fournisseurs de soins de santé qui prodiguent des soins à l'accouchement.
  (Sondez si nécessaire : éducation, formation, supervision, personnel de santé, soutien technique)
- Pouvez-vous me parler des différents programmes de formation préalable à l'emploi – par titres professionnels – qui sont actuellement en place pour éduquer les prestataires de soins de santé fournissant des soins à l'accouchement ?

(Expliquez si nécessaire et veuillez utiliser le tableau ci-dessous pour remplir les informations. Ajoutez plus de lignes si nécessaire)

- Pouvez-vous me dire si de nouveaux programmes de formation initiale sont prévus ?
- Quel type de formation en cours d'emploi est proposé aux prestataires de soins d'accouchement et toute formation en cours d'emploi est-elle obligatoire ?
  (Sondez si nécessaire : formation du ministère de la santé au niveau de l'établissement, cours en ligne, formation dispensée par des ONG ou d'autres organisations)
- Avez-vous un rôle et des responsabilités liés à la planification du personnel de santé ? Si oui, pourriez-vous s'il vous plaît expliquer ?
  (Sondez si nécessaire : par exemple, recrutement, rétention et répartition des prestataires de soins de santé en fonction des compétences (titres), répartition urbaine/rurale, assurer une main-d'œuvre « adaptée à l'objectif »)
- Qu'est-ce qui est fait au sein du ministère de la santé pour assurer le perfectionnement du personnel des prestataires de soins à l'accouchement ?
  (Insistez si nécessaire : p. ex. possibilités d'études et avancement professionnel)
- Y a-t-il d'autres informations que vous aimeriez partager et qui, selon vous, pourraient m'être utiles sur les prestataires de soins à l’accouchement ?

### Questionnaire 2: (Établissement d’enseignement)

Ce guide d'entretien est spécifique au personnel travaillant sur la santé maternelle et néonatale au sein des établissements d'enseignement (infirmier, sage-femme et médecin, ou autres titres utilisés pour ces prestataires)

Nom de l'intervieweur: ________________________________________
Date: _____________________________________________________
Nom de la personne interrogée: ________________________________________

Affiliation de la personne interrogée: _______________________________________

**Expliquer les objectifs de l'entretien**

Expliquez les objectifs de l'entretien et présentez-vous (membre du projet). "Bonjour/après-midi, je suis ____________ (présentez-vous)".
«Nous travaillons sur un projet lié à la mesure du personnel de santé qualifié fournissant des soins à l'accouchement selon la nouvelle définition qui a été publiée en 2018, mais un cadre de mesure n'a pas encore été développé.
La Définition du personnel de santé qualifié de 2018 indique clairement le niveau de compétence attendu d'un prestataire de soins de santé qualifié de « personnel de santé qualifié ». L'importance d'une formation initiale et continue de qualité, de la réglementation et des licences, d'un environnement favorable, de systèmes d'orientation et du travail d'équipe est précisée (une copie du cadre de définition 2018 doit être partagée dans l'invitation par e- mail à participer à cet entretien).
Cet entretien est mené pour obtenir votre avis sur les aspects liés au personnel de santé qualifié fournissant des soins à l'accouchement au (Népal, Sénégal ou Zambie - supprimer la mention inutile). Je suis particulièrement intéressé par les aspects liés à:

- Organization et administration
- Faculte
- Etudiants
- Curriculum
- Ressources, installations et services
- Améliorations de la qualité/Stratégies d'évaluation/Réglementation de l’éducation.

(les questions peuvent varier en fonction du déroulement de l'entretien).

- J'aimerais commencer par vous demander de décrire brièvement votre rôle et vos
  responsabilités par rapport au programme de formation initiale pour les infirmières, les sage-femmes et les médecins dans votre établissement (à remplacer par le groupe de prestataires professionnels pertinent).
  (Examinez si nécessaire : responsabilité de la qualité et de l'organisation du programme de formation initiale, délégation des rôles et des responsabilités, développement du corps professoral et évaluation de la performance du corps professoral)
- Comment décririez-vous votre corps professoral (infirmier, sage-femme, médecin (à remplacer par le groupe de prestataires professionnels pertinent) par rapport à la capacité d'enseignement en ce qui concerne à la fois la théorie et la pratique clinique ?

(Insistez si nécessaire : qualification de l'enseignant, les enseignants ont une préparation formelle à l'enseignement, font preuve de compétence dans la pratique clinique ; l'environnement de travail, le ratio enseignant/étudiant)

- Pouvez-vous me parler des politiques d'admission des étudiants ainsi que des politiques du programme ?
  (Sondez si nécessaire : conditions d'entrée, processus d'admission, politiques écrites pour les étudiants)
- Pouvez-vous me dire comment le programme d'études par service est développé au sein de votre établissement ?
  (Sondez si nécessaire : le contenu du cours, à la fois les éléments théoriques et pratiques sont-ils alignés sur les normes nationales/internationales, les méthodes pédagogiques et les stratégies d'évaluation, le programme partagé avec l'étudiant, la révision et la fréquence du programme, le contenu du programme est basé sur des lignes directrices fondées sur des données probantes et les meilleures pratiques)
- Comment décririez-vous les ressources du programme dans votre établissement ? (Sondez si nécessaire : espace physique, équipement (ordinateurs, Internet, littérature) supports pédagogiques, laboratoires de compétences, sites d'apprentissage clinique pendant la formation, remplir les conditions d'inscription post-formation. Veuillez utiliser la liste de contrôle ci-dessous)

Vérifier la liste pour l'enquêteur et demander si l'un des éléments n'est pas mentionné et ajouter le cas échéant.

-
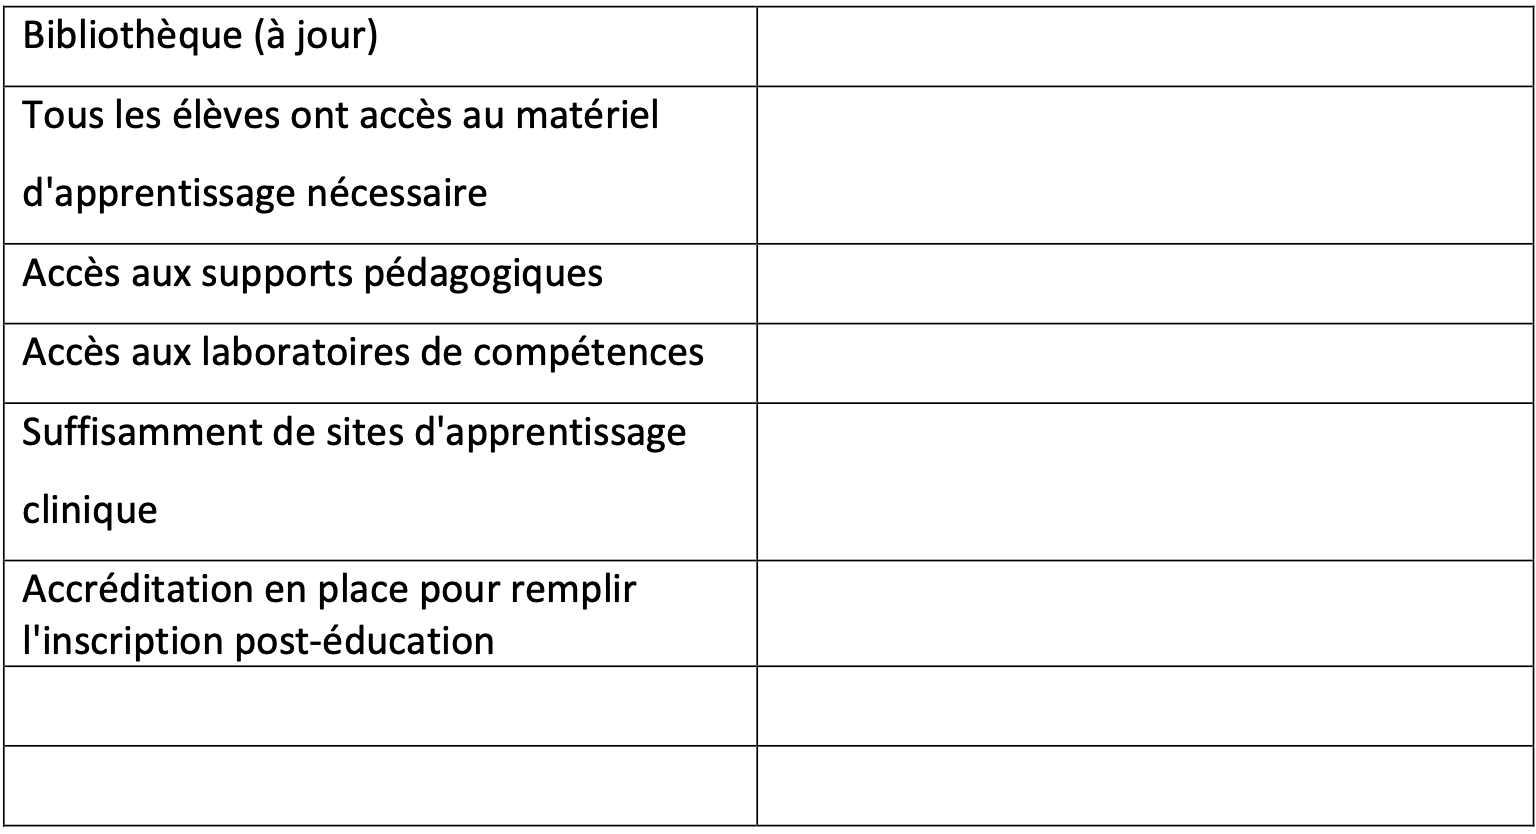

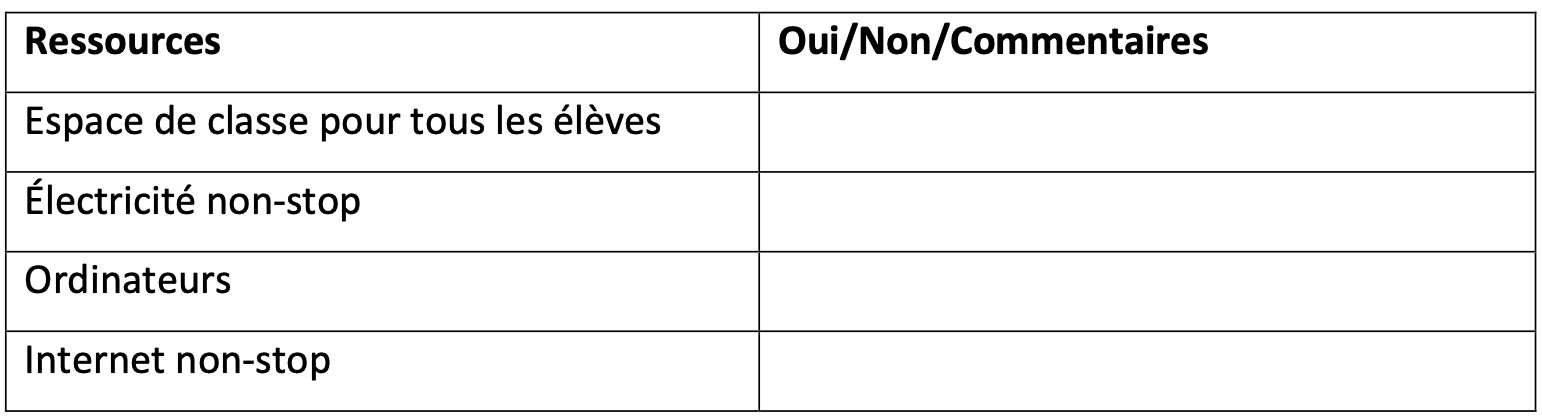
Pouvez-vous décrire les stratégies d'évaluation utilisées dans votre établissement pour évaluer le programme dans le cadre de l'amélioration de la qualité ?
  (Sondez si nécessaire : programme d'études, politiques d'admission, progrès des élèves, attrition, taux de réussite à l'inscription, ressources adéquates)
- Y a-t-il d'autres informations que vous aimeriez partager et qui, selon vous, pourraient m'être utiles concernant votre établissement?

### Questionnaire 3: (l'Office national de la statistique et du HMIS)

*Ce guide d'entretien est spécifique au personnel travaillant au sein de l'Office national de la statistique et du HMIS (personnel responsable des rapports sur les ODD et participant à la réalisation d'enquêtes basées sur la population)*

Nom de l'intervieweur: ________________________________________
Date:_____________________________________________________
Nom de la personne interrogée: ________________________________________

Affiliation de la personne interrogée: _______________________________________

**Expliquer les objectifs de l'entretien**

Expliquez les objectifs de l'entretien et présentez-vous (membre du projet). "Bonjour/après-midi, je suis ____________ (présentez-vous)".

«Nous travaillons sur un projet lié à la mesure du personnel de santé qualifié fournissant des soins à l'accouchement selon la nouvelle définition qui a été publiée en 2018, mais un cadre de mesure n'a pas encore été développé.
La Définition du personnel de santé qualifié de 2018 indique clairement le niveau de compétence attendu d'un prestataire de soins de santé qualifié de « personnel de santé qualifié ». L'importance d'une formation initiale et continue de qualité, de la réglementation et des licences, d'un environnement favorable, de systèmes d'orientation et du travail d'équipe est précisée (une copie du cadre de définition 2018 doit être partagée dans l'invitation par e- mail à participer à cet entretien).

Cet entretien est mené pour obtenir votre avis sur les aspects liés au personnel de santé qualifié fournissant des soins à l'accouchement au (Népal, Sénégal ou Zambie - supprimer la mention inutile). Je suis particulièrement intéressé par les aspects liés à:

- Votre rôle et vos responsabilités dans la mesure et la communication de l'indicateur ODD 3.1.2.
- Votre rôle et vos responsabilités dans la conduite d'enquêtes basées sur la population, par exemple, les enquêtes DHS et MICS (élaboration et analyse de questionnaires).

(les questions peuvent varier en fonction du déroulement de l'entretien).

- J'aimerais commencer par vous demander de décrire brièvement votre rôle et vos responsabilités en ce qui concerne la mesure et l'établissement de rapports sur l'indicateur 3.1.2 des ODD.
  (Expliquez si nécessaire : comment collectez-vous les données, quelles sources de données sont incluses, comment évaluez-vous la qualité des données, comment évaluez-vous quels prestataires sont « qualifiés » par rapport à ceux qui ne sont pas « compétents », vous engagez-vous dans consultation des pays pour le reporting, le calcul et l'analyse des ODD)
- Pouvez-vous décrire votre fonction par rapport à votre participation à la réalisation d'enquêtes en population ? Je suis particulièrement intéressé par le développement des questions et des catégories liées à la question sur le(s) professionnel(s) de la santé qui ont assisté les femmes pendant l'accouchement - qui décide des catégories de professionnels de la santé à inclure (qualifiées et non qualifiées)?
- Pouvez-vous décrire comment vous coordonnez les rapports sur les ODD avec l'unité mère et nouveau-né (ou une autre unité) au sein du ministère de la Santé?
- Pouvez-vous me dire comment les données sur le personnel de santé qualifié fournissant des soins à l'accouchement (indicateur ODD 3.1.2) sont utilisées pour la planification locale?
- Y a-t-il d'autres informations que vous aimeriez partager et qui, selon vous, pourraient m'être utiles concernant la mesure et l'établissement de rapports sur l'ODD 3.1.2?

### Questionnaire 4: (Organisations professionnelles et aux organismes de réglementation)

*Ce guide d'entretien est spécifique aux organisations professionnelles et aux organismes de réglementation (par exemple, ICM et ICN, besoin d'ajouter une organisation pour les médecins)*

Nom de l'intervieweur: ________________________________________
Date: _____________________________________________________

Nom de la personne interrogée: ________________________________________

Affiliation de la personne interrogée: _______________________________________

**Expliquer les objectifs de l'entretien**

Expliquez les objectifs de l'entretien et présentez-vous (membre du projet). "Bonjour/après-midi, je suis ____________ (présentez-vous)".

«Nous travaillons sur un projet lié à la mesure du personnel de santé qualifié fournissant des soins à l'accouchement selon la nouvelle définition qui a été publiée en 2018, mais un cadre de mesure n'a pas encore été développé.
La Définition du personnel de santé qualifié de 2018 indique clairement le niveau de compétence attendu d'un prestataire de soins de santé qualifié de « personnel de santé qualifié ». L'importance d'une formation initiale et continue de qualité, en particulier d'un environnement propice, de systèmes d'orientation et d'un travail d'équipe, est précisée (une copie du cadre de définition 2018 doit être partagée dans l'e-mail d'invitation à participer à cet entretien).

Cet entretien est mené pour obtenir votre avis sur les aspects liés au personnel de santé qualifié fournissant des soins à l'accouchement au (Népal, Sénégal ou Zambie - supprimer la mention inutile). Je suis particulièrement intéressé par votre rôle et vos responsabilités liées à:

- le développement du curriculum
- réglementation/accréditation de la formation initiale
- licence/renouvellement de licence (nécessité d'ajouter le(s) titre(s) professionnel(s)
  pertinent(s) sage-femmes/infirmiers/médecins).
  (les questions peuvent varier en fonction du déroulement de l'entretien).
- J'aimerais commencer par vous demander de décrire brièvement votre rôle et vos responsabilités en ce qui concerne la réglementation/accréditation de la formation initiale pour (nécessité d'ajouter le(s) titre(s) professionnel(s) pertinent(s)) ainsi que les licences/renouvellement de licences.
- Pouvez-vous me parler de la réglementation et de la législation pour exercer (pour les infirmières, sage-femmes, médecins ou autres professionnels, veuillez inclure le titre pertinent pour l'entretien), la constitution et la composition de l'organisme de réglementation et les procédures ?
  (Examinez si nécessaire : pas de législation, les règles sont en place mais ne fonctionnent pas (inefficaces), l'autorité en place et fonctionne bien, la constitution et la composition de l'organisme de réglementation (membres - y compris les membres élus et nommés), leurs pouvoirs, les mécanismes de rapport et responsabilités).
- Pouvez-vous me parler des mécanismes et procédures d'octroi de licences et de renouvellement de licences pour (pour les infirmières, les sage-femmes, les médecins ou d'autres professionnels doivent inclure un titre pertinent pour l'entretien) ?
  (Sondez si nécessaire : pour la licence initiale ; les exigences de test (norme de réussite), la vérification des qualifications, la durée de la licence initiale, les frais de licence initiale.

Pour le renouvellement : les exigences d'évaluation continue des compétences, les mises à jour des connaissances, l'évaluation des compétences cliniques, les frais de renouvellement de licence).

- Pouvez-vous me parler de votre rôle et de vos responsabilités dans l'élaboration des programmes d'études pour
  (pour les infirmières, les sage-femmes, les médecins ou d'autres professionnels doivent inclure un titre pertinent pour l'entretien) ?
  (Sondez si nécessaire : contenu du curriculum, révisions/mises à jour, niveau de compétences, critères d'évaluation, considérations pédagogiques, mise en œuvre)
- Y a-t-il d'autres informations que vous aimeriez partager et qui, selon vous, pourraient m'être utiles concernant votre capacité en tant qu'organisation professionnelle pour (ajouter l'organisation pertinente)?

### Questionnaire 5: (Représentants de l'EDS et de la MICS)

*Ce guide d'entretien est spécifique aux représentants de l'EDS et de la MICS (enquête de population auprès des ménages)*

Nom de l'enquêteur : ________________________________________
Date: _____________________________________________________
Nom de la personne interrogée : ________________________________________

Affiliation de la personne interrogée : _______________________________________

Expliquez les objectifs de l'entretien et présentez-vous (membre du projet). "Bonjour/après-midi, je suis ____________ (présentez-vous)".

«Nous travaillons sur un projet lié à la mesure du personnel de santé qualifié fournissant des soins à l'accouchement selon la nouvelle définition qui a été publiée en 2018, mais un cadre de mesure n'a pas encore été développé.
La Définition du personnel de santé qualifié de 2018 indique clairement le niveau de compétence attendu d'un prestataire de soins de santé qualifié de « personnel de santé qualifié ». L'importance d'une formation initiale et continue de qualité, de la réglementation et des licences, d'un environnement favorable, de systèmes d'orientation et du travail d'équipe est précisée (une copie du cadre de définition 2018 doit être partagée dans l'invitation par e- mail à participer à cet entretien).

Cet entretien est mené pour obtenir votre avis sur les aspects liés au personnel de santé qualifié fournissant des soins à l'accouchement au (Népal, Sénégal ou Zambie - supprimer la mention inutile). Je suis particulièrement intéressé par le développement du questionnaire d'enquête et l'adaptation locale pour la question relative à quel(s) professionnel(s) de la santé qui ont assisté les femmes lors de l'accouchement ("qui a assisté à l'accouchement de (nom) ?")

(les questions peuvent varier en fonction du déroulement de l'entretien).

- Je voudrais commencer par vous demander de décrire votre rôle et vos responsabilités
  en ce qui concerne le développement du questionnaire DHS/MICS, l'adoption locale et la personnalisation
- Quelles sont vos expériences de travail avec les pays dans la personnalisation du questionnaire et les parties prenantes impliquées dans ce travail ?
- Y a-t-il d'autres informations que vous aimeriez partager et qui, selon vous, pourraient m'être utiles concernant l'élaboration et l'analyse du questionnaire ?

### Questionnaire 6: (OMS, UNICEF, UNFPA)

*Ce guide d'entretien est spécifique aux représentants des bureaux de pays de l'OMS, de l'UNICEF et de l'UNPFA*

Nom de l'enquêteur : ________________________________________
Date:____________________________________________________
Nom de la personne interrogée :________________________________________

Affiliation de la personne interrogée : _______________________________________

Expliquez les objectifs de l'entretien et présentez-vous (membre du projet). "Bonjour/après-midi, je suis ____________ (présentez-vous)".

«Nous travaillons sur un projet lié à la mesure du personnel de santé qualifié fournissant des soins à l'accouchement selon la nouvelle définition qui a été publiée en 2018, mais un cadre de mesure n'a pas encore été développé.
La Définition du personnel de santé qualifié de 2018 indique clairement le niveau de compétence attendu d'un prestataire de soins de santé qualifié de « personnel de santé qualifié ». L'importance d'une formation initiale et continue de qualité, de la réglementation et des licences, d'un environnement favorable, de systèmes d'orientation et du travail d'équipe est précisée (une copie du cadre de définition 2018 doit être partagée dans l'invitation par e- mail à participer à cet entretien).

Cet entretien est mené pour obtenir votre avis sur les aspects liés au personnel de santé qualifié assurant la mesure des soins à l'accouchement au (Népal, Sénégal ou Zambie - supprimer la mention inutile). Je suis particulièrement intéressé par votre implication en ce qui concerne la formation des prestataires de soins à l'accouchement et les programmes de santé maternelle et néonatale du ministère de la Santé.

(les questions peuvent varier en fonction du déroulement de l'entretien).

- J'aimerais commencer par vous demander de décrire votre rôle et vos responsabilités en ce qui concerne les programmes de santé maternelle et néonatale et leur mise en œuvre, et en particulier les mesures relatives à l'ODD 3.1.2.
- Pouvez-vous me parler de votre implication et de vos rôles par rapport aux programmes de formation initiale et continue pour les prestataires de soins de santé fournissant des soins à l'accouchement et le personnel de santé fournissant des services de garde d'enfants?
- Y a-t-il d'autres informations que vous aimeriez partager et qui, selon vous, pourraient m'être utiles concernant l'éducation/la formation des prestataires fournissant des soins à l'accouchement aux programmes de santé maternelle et néonatale du point de vue du bureau de pays?

# Supplementary Figure 3: Consent form

[EN-TÊTE INSTITUTIONNEL]

**Formulaire de consentement éclairé pour**

Ce formulaire de consentement éclairé est destiné aux parties prenantes que nous invitons à participer au projet intitulé "Développement d'une mesure faisable et utile du" personnel de santé qualifié "fournissant des soins à l'accouchement selon la définition et la déclaration conjointe de 2018 : Népal, Sénégal et Zambie comme exemples d'études de cas ».

**Nom des principaux membres de l'équipe du projet** : Ann-Beth Moller et Loveday Penn-Kekana. **Nom du membre de l'équipe du projet au Népal : xxx
Nom du membre de l'équipe du projet au Sénégal : xxx
Nom du membre de l'équipe du projet en Zambie : xxx**

**Nom des organisations :** Organisation mondiale de la santé et London School of Hygiene and Tropical Medicine.

**Nom du projet :** Développement d'une mesure réalisable et utile du « personnel de santé qualifié » fournissant des soins à l'accouchement conformément à la définition de 2018 et à la déclaration conjointe : le Népal, le Sénégal et la Zambie comme exemples d'études de cas.

**Ce formulaire de consentement éclairé comporte deux parties :
• Fiche d'information (pour partager des informations sur l'étude avec vous)
• Certificat de consentement (pour les signatures si vous choisissez de participer)**

**Vous recevrez une copie du formulaire de consentement éclairé complet**

**Partie I : Fiche d'information
Introduction**Je suis, XX, travaillant pour le XXXX. Je fais partie de l'équipe de projet travaillant sur la mesure du personnel de santé qualifié fournissant des soins à l'accouchement selon la définition 2018 et la déclaration conjointe.

Je vais vous donner des informations et vous inviter à faire partie de ce projet. Avant de vous décider, vous pouvez parler du projet à toute personne avec qui vous vous sentez à l'aise.
Ce formulaire de consentement peut contenir des mots que vous ne comprenez pas. S'il vous plaît, demandez-moi d'arrêter pendant que nous parcourons les informations et je prendrai le temps de vous expliquer. Si vous avez des questions plus tard, n'hésitez pas à demander.

**But du projet**

Les preuves suggèrent que si les pays ont signalé des niveaux relativement élevés d'accouchements assistés par du personnel de santé qualifié, la mortalité maternelle et néonatale n'a pas été réduite proportionnellement.
Pour relever ces défis, un groupe de travail composé du groupe interinstitutions comprenant l'OMS, l'UNICEF et le FNUAP, et la Confédération internationale des sage-femmes (ICM), le Conseil international des infirmières (CII), la Fédération internationale de gynécologie et d'obstétrique (FIGO) et L'Association internationale de pédiatrie (IPA) a lancé un processus visant à clarifier et à affiner la définition du terme et de l'indicateur largement utilisés « accoucheuse qualifiée » (SBA). Le résultat de ce travail a été une définition révisée (Définition et déclaration de 2018) du personnel de santé qualifié. Un cadre de mesure doit encore être développé pour permettre aux pays de mesurer et de rapporter sur la base de la définition révisée de 2018 de cet indicateur important.

Avec ce projet, nous aspirons à opérationnaliser la mesure de la "Définition 2018 du personnel de santé qualifié" afin qu'elle puisse être utilisée à l'échelle nationale et mondiale pour améliorer la mesure actuelle de l'indicateur ODD 3.1.2 "pourcentage d'accouchements assistés par un professionnel de la santé qualifié" .

Nous pensons que vous pouvez nous aider en nous racontant vos expériences liées à la mesure des « professionnels de santé qualifiés fournissant des soins à l'accouchement » ou souvent appelés
« accoucheuses qualifiées » et d'autres aspects des concepts inclus dans la définition de 2018..

**Type d'intervention du projet**

Ce projet impliquera votre participation à un entretien d'une heure (entretien en face à face ou entretien virtuel).

**Sélection des participants**

Vous êtes invité à participer à ce projet parce que nous estimons que votre expérience en tant qu'(infirmière en chef du gouvernement/sage-femme en chef du gouvernement - doit changer selon la partie prenante) peut beaucoup contribuer à notre compréhension et à notre connaissance du professionnel de la santé qualifié fournissant des soins à l'accouchement. ainsi que sa mesure.

**Participation volontaire**

Votre participation est entièrement volontaire. Si vous décidez de participer à l'entretien, vous pouvez vous retirer à tout moment. Vous avez également la possibilité de refuser de répondre aux questions. Si vous arrêtez de participer à l'entretien ou si vous ne répondez à aucune des questions, cela ne vous affectera en aucune façon.

**Procédures**

Si vous acceptez de participer à cet entretien, vous devrez assister à un entretien en face à face ou virtuel le jour de votre choix. L'entretien durera environ une heure et consistera en une discussion sur votre rôle actuel et les activités liées à la mesure du professionnel de la santé qualifié fournissant des soins à l'accouchement. L'entretien sera enregistré. Les enregistrements audio sont conçus pour aider les membres de l'équipe du projet à entendre exactement ce qui a été dit et ne seront utilisés qu'aux fins du projet. Les enregistrements seront transcrits et auront des codes d'identification au lieu de votre nom.
Si vous ne souhaitez répondre à aucune des questions pendant l'entretien, vous pouvez le dire et l'intervieweur passera à la question suivante. Les informations enregistrées sont confidentielles et seule l'équipe du projet aura accès aux fichiers. Votre nom n'apparaîtra sur aucun formulaire, vous serez inscrit avec un numéro (code) spécifique pour chaque participant. Une partie des informations de cette interview peut être publiée, mais les publications n'incluront pas les noms des participants. Le dossier sera archivé et détruit au bout de cinq (05) ans.
**Durée**Le projet se déroule sur une période d'environ un an. Pendant ce temps, nous vous interviewerons et vous enverrons la transcription pour votre considération et validation.

**Des risques**

Lors de la participation à l'entretien, le principal risque est la perte de confidentialité, c'est-à-dire le risque que les informations que vous nous fournissez soient divulguées de manière inappropriée. Cependant, il sera rappelé aux enquêteurs que tout ce qui sera dit lors de l'entretien restera confidentiel. Il existe également un risque que vous partagiez par hasard des informations personnelles ou confidentielles, ou que vous vous sentiez mal à l'aise d'aborder certains sujets. Néanmoins, nous ne souhaitons pas que cela se produise. Vous n'êtes pas obligé de répondre à une question ou de participer à l'entretien si vous pensez que la ou les questions sont trop personnelles ou si en parler vous met mal à l'aise.

Les membres de notre équipe de projet ont été formés aux questions éthiques liées à la conduite d'entretiens.

**Avantages**

Il n'y aura aucun avantage direct pour vous, mais votre participation est susceptible de nous aider à opérationnaliser la mesure de la "Définition 2018 du personnel de santé qualifié" afin qu'elle puisse être utilisée à l'échelle nationale et mondiale pour améliorer la mesure actuelle de l'ODD 3.1.2 indicateur « pourcentage de naissances assistées par un professionnel de la santé qualifié ».

**Remboursements**

Aucune incitation ne vous sera fournie pour participer à l'entretien.

**Confidentialité**

Toutes les informations relatives aux entretiens resteront confidentielles. Nous prendrons toutes les précautions pour protéger votre vie privée. Toutes les informations seront enregistrées sur un serveur sécurisé, y compris votre nom et d'autres informations d'identification personnelle. Les fichiers ne seront accessibles qu'à l'équipe du projet. Votre nom n'apparaîtra sur aucun formulaire, vous serez inscrit avec un numéro (code) spécifique pour chaque participant. Les informations de cette interview peuvent être publiées, mais les publications n'incluront pas les noms.

**Partager les résultats**

Rien de ce que vous nous direz aujourd'hui ne sera partagé avec qui que ce soit en dehors de l'équipe du projet, et rien ne vous sera attribué nommément. Les connaissances que nous obtenons de ce projet seront partagées avec vous avant qu'elles ne soient largement diffusées au public. Chaque participant recevra un résumé des résultats.

**Droit de refus ou de rétractation**

Vous n'êtes pas obligé de participer à ce projet si vous ne le souhaitez pas et choisir de participer ne vous affectera en aucune façon. Vous pouvez arrêter de participer à l'entretien à tout moment que vous souhaitez sans vous affecter de quelque manière que ce soit.

**Qui contacter ?**

Si vous avez des questions, vous pouvez les poser maintenant ou plus tard. Si vous souhaitez poser des questions plus tard, vous pouvez contacter l'un des:

- Ann-Beth Moller: mollera@who.int
- Loveday Penn-Kekana: loveday.penn-kekana@lshtm.ac.uk
- Ajouter le nom du consultant local

**Cette proposition a été examinée et approuvée par [nom de l'IRB local], qui est un comité dont la tâche est de s'assurer que les participants à la recherche sont protégés contre tout préjudice. Si vous souhaitez en savoir plus sur la CISR, contactez [nom, adresse, numéro de téléphone.]). Il a également été revu par le Global Health Ethics de l'Organisation mondiale de la santé (OMS).**

**Partie II : Certificat de consentement
J'ai été invitée à participer au projet sur le** "Développement d'une mesure réalisable et utile du" personnel de santé qualifié "fournissant des soins à l'accouchement selon la définition et la déclaration conjointe de 2018 : Népal, Sénégal et Zambie comme exemples d'études de cas".
**J'ai lu les informations qui précèdent ou elles m'ont été lues. J'ai eu l'occasion de poser des questions à ce sujet et toutes les questions qui m'ont été posées ont reçu une réponse à ma satisfaction. Je consens volontairement à participer à cette étude
Nom en caractères d'imprimerie du participant__________________
Signature du Participant ___________________
Date ___________________________**Jour mois année

**Déclaration du membre de l'équipe de projet/de la personne prenant le consentement:**

**J'ai lu avec précision la fiche d'information au participant potentiel et, au mieux de mes capacités, je me suis assuré que le participant comprend que ce qui suit sera fait :**

**1. L'entretien sera enregistré
2. Les enregistrements seront transcrits
3. La transcription sera envoyée à l'interviewé pour validation
Je confirme que le participant a eu la possibilité de poser des questions sur l'étude et que toutes les questions posées par le participant ont reçu une réponse correcte et au mieux de mes capacités. Je confirme que la personne n'a pas été contrainte à donner son consentement et que le consentement a été donné librement et volontairement.
Une copie de cet ICF a été remise au participant.**

**Nom en caractères d'imprimerie du membre de l'équipe de projet/de la personne prenant le consentement________________________
Signature du membre de l'équipe de projet/de la personne prenant le consentement__________________________**

**Date ___________________________**

Jour mois année

# Supplementary Figure 4: Survey questions

#### Student survey questions

**QUESTIONNAIRE ETUDIANTS ECOLES DE FORMATION SAGES FEMMES ET INFIRMIERS**

*Ce questionnaire est destiné aux élèves de dernière année de formation des écoles (2 à 3 par école)*

1. **Organisation et administration des structures de formation (gouvernance) : corps professoral**
   1. Nombre total d’enseignants de votre année actuelle de formation :
   2. Nombre total d’étudiants sage-femmes de votre promotion :
   3. Comment qualifiez-vous les compétences des enseignants de votre école (enseignement théorique/à l’école):
      1. Très compétent
      2. Moyennement compétent
      3. Pas compétent
   4. Comment qualifiez-vous les compétences des encadreurs des sites de stage (enseignement pratique/durant les stages):
      1. Très compétent
      2. Moyennement compétent
      3. Pas compétent
   5. Est-ce que vous avez fait des stages pratiques dans les structures de santé ? (oui/Non)
   6. Avez-vous réalisé de manière autonome un accouchement durant vos stages pratiques ? (oui/Non)
2. **Admission des Étudiants :**
   1. Quelles sont les conditions d’entrée à votre école de formation ? (question ouverte)
   2. Disposez-vous de documents sur les procédures d’admission ? (oui/Non)
3. **Contenu du Curriculum (aspects théoriques et pratiques) :**
   1. Disposez-vous du programme de formation de cette année ? (oui/Non)
   2. Est-ce que les mannequins sont utilisés dans la structure pour les formations ? (oui/Non)
   3. Quel est le rythme d’évaluation des connaissances ? (mensuel, trimestriel, annuel, à la fin de l’enseignement de chaque matière ?)
   4. Est-ce que vous avez un cahier de l’apprenant /carnet de stage pour les stages dans les structures de santé, avec des gestes techniques à valider sur place? (oui/Non)
   5. Si oui, est-ce que ce cahier est utilisé dans votre évaluation ? (oui/Non)
4. **Disponibilité des ressources pédagogiques**

| **Ressources** | **Oui/Non/Commentaires**  (0= non satisfaisant ; 1= oui satisfaisant ; 2= excellent) et commentaires |
| --- | --- |
| Espace de classe pour tous les élèves |  |
| Électricité non-stop |  |
| Ordinateurs |  |
| Internet non-stop |  |
| Bibliothèque (à jour) |  |
| Tous les élèves ont accès au matériel d'apprentissage nécessaire |  |
| Accès aux supports pédagogiques |  |
| Accès aux laboratoires de compétences |  |
| Disponibilité et qualité du matériel des laboratoires de compétences |  |
| Suffisamment de sites d'apprentissage clinique |  |
| Qualité des sites de stage :   - Est-ce qu’il y a assez d’activités/patientes dans le site de stage où vous êtes pour vous permettre de pratiquer et de maitriser ce qui est enseigné en cours ? (Volume d’activités suffisant pour acquisition des compétences) - Est-ce que la structure où vous êtes actuellement en stage dispose de matériel et d’équipements suffisants pour réaliser les accouchements dans de bonnes conditions ? (Plateau technique adéquat pour les accouchements) |  |

1. **Stratégies d’amélioration de la qualité et de réglementation de la formation** :
   1. Que pensez-vous du taux de réussite de votre école
      1. Excellent
      2. Moyen
      3. Mauvais
   2. Que pensez-vous de la qualité du programme enseigné dans votre école ?
      1. Adapté à vos besoins ? (oui/Non)
      2. Adapté à l’évolution de la science ? (oui/Non)
2. A**utres informations** que vous aimeriez partager et qui, selon vous, pourraient être utiles concernant votre établissement? (question ouverte)

#### Administrator survey

**QUESTIONNAIRE RESPONSABLES DES INSTITUTIONS DE FORMATION DE MÉDECINS, SAGES FEMMES, INFIRMIERS**

1. **Rôle et responsabilités par rapport au programme de formation initiale** pour les infirmières, les sage-femmes dans votre établissement :
   1. responsable de la qualité et de l'organisation du programme de formation
   2. responsable de la composition/mise eb place du corps professoral
   3. responsable de l’évaluation de la performance du corps professoral
   4. autres rôles (à préciser)
2. **Corps professoral de l’institution :**
   1. Nombre total d’enseignants filière sage-femmes
   2. Nombre total d’enseignants filière infirmiers
   3. Nombre total d’élèves sage-femmes
   4. Nombre total d’élèves infirmiers
   5. les enseignants ont une préparation formelle à l'enseignement (oui/Non)
3. **Politiques d'admission des étudiants ainsi que des politiques du programme**
   1. Quelles sont les conditions d’entrée à votre école de formation ? (question ouverte)
   2. Disposez-vous de documents sur les procédures d’admission ?
   3. Existe-t-il des politiques écrites pour les étudiants ?
4. **Élaboration du le programme d'études *par année* au sein de votre établissement** ?
   1. le contenu du cours, à la fois les éléments théoriques et pratiques sont-ils alignés sur les normes nationales/internationales (oui/Non)
   2. Le programme de formation est-il partagé aux étudiants ? (oui/Non)
   3. A quelle fréquence le programme est révisé ?
   4. La révision du programme est-il basé sur les lignes directrices fondées sur des données probantes et les meilleures pratiques ? (oui/Non)
5. **Disponibilité des ressources pédagogiques**

| **Ressources** | **Oui/Non/Commentaires**  (0= non satisfaisant ;  1= oui satisfaisant ;  2= excellent) et commentaires |
| --- | --- |
| 1. Espace de classe pour tous les élèves |  |
| 1. Électricité non-stop |  |
| 1. Ordinateurs |  |
| 1. Internet non-stop |  |
| 1. Bibliothèque (à jour) |  |
| 1. Tous les élèves ont accès au matériel d'apprentissage nécessaire |  |
| 1. Accès aux supports pédagogiques |  |
| 1. Accès aux laboratoires de compétences |  |
| 1. Disponibilité et qualité du matériel des laboratoires de compétences |  |
| 1. Suffisamment de sites d'apprentissage clinique |  |
| 1. Qualité des sites de stage : 2. Est-ce que les sites de stage disposent d’assez d’encadreurs compétents pour encadrer les étudiants (nombre suffisant et qualité/compétences des encadreurs) 3. Est-ce qu’il y a assez d’activités/patientes dans le site de stage pour permettre aux étudiants de pratiquer et de maitriser ce qui est enseigné en cours ? (Volume d’activités suffisant pour acquisition des compétences) 4. Est-ce que les sites de stages disposent de matériel et d’équipements suffisants pour réaliser les accouchements dans de bonnes conditions ? (Plateau technique adéquat pour les accouchements) |  |

1. **Stratégies d’amélioration de la qualité et de réglementation de la formation** :
   1. Comment décrivez-vous le taux de réussite de votre école
      1. Excellent
      2. Moyen
      3. Mauvais
   2. Que pensez-vous de la qualité du programme enseigné dans votre école ?
      1. Adapté aux besoins des étudiants? (oui/Non)
      2. Adapté à l’évolution de la science ? (oui/Non)
2. A**utres informations** que vous aimeriez partager et qui, selon vous, pourraient être utiles concernant votre établissement? (question ouverte)

# Supplementary Figure 5: Additional Quotes

### Pre-service education

Decreasing skill level of recent graduates from pre-service education

From the perspective of a stakeholder at a reproductive health research and training institution: *“in any case a discipline which is essentially manual, essentially practical, but which is taught more and more theoretically. That means there are a lot fewer practices. And what I'm talking about, I came from a workshop two weeks ago where the same problem came up. We spoke with teachers and products from public and private schools, but the observation is the same. This means that basic training should allow agents to acquire the essential skills for providing care, which is already, if I may say, correct, and even now presents faults and difficulties.”*

Educators and supervisors at some schools do not have sufficient experience to effectively teach students

School managers shared a variety of requirements for teachers between schools: In some schools, teachers are required to have at least a Master's degree and additional practical training. Others require teachers to have a state diploma and at least 10 years' experience in midwifery or nursing. Depending on the region and the specialty taught, there is collaboration between private schools and qualified Centre Régional de Formation en Santé (CRFS) teachers. However, some schools do not have guidelines on who can become an educator, and educators do not need to have a clinical background. In the majority of schools, especially private ones, the teaching staff is made up of teachers and training site supervisors who do not have experience in competency-based learning approaches.

One national level government stakeholder shared: *“for the MSAS, the curriculum is good even if there is a problem of trainers.”*

A regional chief medical officer noted: *“It's all the more true that when we look at the teaching staff there at the student's level, we realize that they are not real teachers…Because often, we make do with what we have at hand.”*

One stakeholder from a private educational institution shared: *“in terms of the people who supervise the students on the internship site, they have not been trained or the majority of them are not…and this constitutes another blocking factor which can more or less slow down the student's performance.”*

Some schools recruit midwife study coordinators who have field experience and who continue to take shifts in health facilities at least once a week, which improves the quality of education. However, this remains an exception. Even when educators do have sufficient background to teach, they do not always need to maintain clinical practice requirements. One government stakeholder involved in training shared: *“But you take people who teach in these schools and who have almost no activity anymore. It's like instructors or high school teachers who only teach. Whereas at this level, they should be at the clinic all the time, at the maternity ward level, practicing themselves to already maintain control. Because not only do they have to teach, they have to provide theoretical lessons, but above all practical lessons before doing the internships. But all this poses a problem because even the practical lessons, according to the latest information I received, are not satisfactory*.”

A professional association shared their thoughts about the connection between educators and quality of health care: *“Speaking about the masters programs and lack of qualified trainers: We want to improve the health of our populations. We will have to stand up to talk about training and regulations.”*

Insufficient practical training during pre-service education

A government stakeholder shared the following with respect to one school: *“But this institution, when we do not have a practical work room and our students who study in these schools, they tell us that we do not have a practical work room, the practical work we do in our classrooms. How can we do a practice in a classroom?”*

Especially in Dakar, given the number of private training schools, some respondents shared that students have to find their own internship sites without institutional support. A reproductive health coordinator shared that *"skills are not taught in Dakar's private training schools, especially practical skills."*

Other stakeholders shared that for nurses, there has been a decline in obstetrics training as well as the quality of internships, and internships are now only in health posts rather than hospitals. A national-level stakeholder shared: *"As for nurses, they are regarded as qualified personnel for deliveries, whereas in practice they are not competent (insufficient respect for the amount of time for obstetrics in basic training at theoretical level), and in practical training they are confronted with the same problems as midwives (training sites and supervision). What's more, their final assessment does not really take obstetrics into account. For nursing assistants, the situation is even worse!*”

Another national level government stakeholder shared: *“In my experience, I had to participate in the certification of midwives for the exit exam but I met midwives who had never practiced childbirth. This poses a lot of problems and I know it's not something exceptional. It's something that actually exists.”*

A reproductive health coordinator shared: *“but the midwives, I'm not sure they do the practical training as required in maternity wards. Because most often, these are internships in medicine or surgery. But in maternity hospitals I rarely see them there.”*

Another national level government stakeholder shared: *“In some regions, the doctor can give a diploma to a midwife who has never been to the delivery room, who has never supported a birth.”*

One respondent reported that overcrowded teaching hospitals were reported to often prioritize medical students, leaving midwifery students with limited opportunities for practical exposure.

Several schools reported that there are too many students or not enough materials at the internship sites for each student to acquire sufficient practical skills for managing childbirth.

### Regulation & legislation

School diplomas may be awarded without a state diploma

One respondent from a professional association shared: “*At present, midwives are recruited into health structures by health committees on the basis of certificates issued by schools for the completion of 3 years of study, without a midwifery [state] diploma. They are called ‘community staff’.”*

Another respondent from a professional association shared: “*they are just people [midwives] who have trained for three years or more who did not pass the exam, but who unfortunately work both in the public service and in the private service”.* This interviewee also shared: “*we find in certain health posts midwives who are there who are recruited by the committees of health CDS [Comités de Développement Sanitaires] with the agreement of the district chief physician and not having a midwifery diploma*”.

One respondent from a reproductive health research and training institution shared: *“midwives who do not manage to obtain a state diploma...they will have school diplomas. And it is with this school diploma that they will be used as assistant midwives.”*

Reflecting on the school diplomas, one respondent suggested that "*The MSAS should regulate this situation and keep control of this certification. It should be the regulator"*.

Another government stakeholder involved in reproductive health shared their experience visiting a facility meeting staff called midwives, however, they lacked state qualifications: “*they didn't even have midwifery diplomas. They were recruited as midwives….Because to be midwives, you must have a state diploma. And they don't have a state diploma.”*

Low national exam success rates

One government stakeholder shared: “*if you don't train your learners properly, they have problems taking the certification exam. That is the problem. Have you seen the certification exam pass rate now? We can't get 10% now on the certification exam*.”

Limited accreditation or quality control on private nursing and midwifery schools

Referring to one school where they performed an audit, one government official shared: “*And what's even worse is that there are some of these schools that have been accredited. They have accredited these schools and these schools are the worst schools that we have seen….[this school] is even in the process of issuing diplomas to its students who no longer even go through certification*.”

On the topic of quality difference between schools, one respondent from a professional organization shared: *“They [the schools] are not at the same level. That's it. Now, today, do you think that these schools…we must leave it to them to train,…should we leave it to them to issue the diploma? This greatly opens the door to all these schools which are established, whether they are well rated or not, to issue their diploma.”*

Fragmented and overlapping responsibilities for regulation between three ministries

Another stakeholder suggested that the: *"problem of the management of basic training by 3 ministries needs to be resolved once and for all. The Ministry of Higher Education should have the lead, since this is now a university diploma, and should collaborate with the MSAS."*

One development partner suggested: *“But here, today, the big question is with which ministry should we go squarely towards the ministry of health or both? That's difficult. So we really need to have a clear idea of who would actually take care of this.”*

One development partner shared their thoughts: *“There is a real problem with monitoring what is happening in these training schools. And I think that the Ministry of Health, together with the Ministry of Vocational Education, should take a slightly more critical look at how to ensure good monitoring in the implementation of these training schools.”*

A government official from the Ministry of Health shared: *“What we can do is ask the institution not to participate in the certification exam simply because the delivery of learning poses a problem. So, based on the progress of lessons, we can say that the school or the learner does not have the 180 credits needed to take the certification exam. This is what we can do.”*

Lack of authorization to practice for nurses and midwives, with delayed development of professional orders

A respondent from a professional association shared: *“I didn't see in the chapter on renewal but it is especially in relation to a person who is registered but who has remained a long time without practicing before being issued with a license to practice, we must be able to take tests and do continuing education before to be able to practice.”*

A development partner shared their perspective: *“Regulated means that there is an order which authorizes them to practice. Today, there is no one who authorizes it. You have your diploma and all the problems that there are around the diploma, that will solve the problem of this diploma because there is only authorization. That is to say, only such a diploma is valid to be a midwife. I think we need to bring back advocacy. Especially now there are many schools. There must be a body that gives authorization to practice. Beyond that, this body must also provide renewals of practice.”*

The law setting up the order of midwives has been passed since January 2017, but the implementing decrees have still not been obtained. The document still requires the approval of several ministries: Finance, Higher Education, then the Council of Ministers and the President. For an order of nurses and nursing assistants, the MSAS strategic plan provided a plan to establish the Order. Base documents were developed for the order by ANIIDES, the International Secretariat of Nurses and WAHO. The document had been filed with MSAS since 2019, updated in 2020, and is currently with MSAS Legal Services.

A stakeholder from the nursing association shared: *“But unfortunately, they introduced the texts…and left the implementing decree stranded… it's hard to get an audience with the authorities, it's a whole bunch of problems.”*

A respondent from a national public educational institution shared: “*The* *order is essential to ensure quality and accountability, but there is a lack of political will to complete the whole process.”*

### In-service training and provision

Variety of continuing education programs, but no requirements for these programs

Respondents shared that several types of continuing education programs and in-service training programs exist in Senegal, including at district and regional levels, workshops/seminars for the dissemination of policies, protocols and innovations, post-training follow-up in some regions, skills-based training, simulation workshops, on-site coaching, and e-learning programs. However, continuing education as well as continued assessment of skills is not mandatory for childbirth care providers in Senegal. Respondents involved in continuing education revealed that there are no standards for continuing education: each program organizes the trainings in the format, duration, and certification they prefer. In-service training is not systematic, and there is no database that tracks the providers that have been trained. Stakeholders suggested systematizing in-service training efforts and making it more formally recognized to have these trainings contribute to career progression.

One development partner shared: *“There is a need to change it so that more, even beyond its practice, and how to organize capacity building. At one point, midwives, how one can apply, I think that the idea of being a senior technician, all these aspects, will be, from my point of view, sources of reinforcement, of additional motivation for the providers, exactly, in career planning.”*

According to professional associations, continuing education is a necessity in the form of personal development and should be mandatory: "*The professional associations and the ASGO should ensure that providers take part in continuing training courses that give points for assignments, for example, or for renewal of their license to practice."*

One stakeholder shared: *"...If it were integrated into the career plan, there would be changes in continuing training".*

# Supplementary Table 1: Curricula assessment score of five pre-service education programs mapped against the 2019 ICM Competencies in “care during labour and birth” category

| **Section of Category 3 ICM Competencies** | **Type** | **Indicator (short format)** | **Public midwifery program** | **Private midwifery program** | **Nursing program** | **Assistant nursing program** | **Medical doctor program** |
| --- | --- | --- | --- | --- | --- | --- | --- |
| 3a: Promote labor | Knowledge | Cultural beliefs / traditions | 0 | 0 | 0 | 0 | 0 |
| 3a: Promote labor | Knowledge | Fetal presentation anatomy / mechanisms | 1 | 1 | 1 | 1 | 1 |
| 3a: Promote labor | Knowledge | IPC guidelines | 1 | 1 | 1 | 0 | 1 |
| 3a: Promote labor | Knowledge | Methods of fetal assessment | 1 | 1 | 1 | 1 | 1 |
| 3a: Promote labor | Knowledge | Physiologic progression of labor | 1 | 1 | 0 | 1 | 1 |
| 3a: Promote labor | Knowledge | Signs of labor progress | 1 | 1 | 1 | 1 | 1 |
| 3a: Promote labor | Skills and behaviours | Allow birth setting preference | 1 | 1 | 1 | 1 | 1 |
| 3a: Promote labor | Skills and behaviours | Assess maternal-fetal status | 1 | 1 | 1 | 1 | 0 |
| 3a: Promote labor | Skills and behaviours | Assess physical responses to labor | 0 | 0 | 0 | 0 | 0 |
| 3a: Promote labor | Skills and behaviours | Augment uterine contractility | 1 | 1 | 0 | 0 | 1 |
| 3a: Promote labor | Skills and behaviours | Encourage movement / positions | 1 | 1 | 1 | 1 | 1 |
| 3a: Promote labor | Skills and behaviours | Inform / support / encourage mother | 0 | 0 | 0 | 0 | 0 |
| 3a: Promote labor | Skills and behaviours | Obtain obstetric / medical history | 1 | 1 | 1 | 1 | 1 |
| 3a: Promote labor | Skills and behaviours | Order / interpret laboratory tests | 1 | 1 | 1 | 0 | 1 |
| 3a: Promote labor | Skills and behaviours | Perform / interpret physical examination | 1 | 1 | 1 | 1 | 1 |
| 3a: Promote labor | Skills and behaviours | Prevent unnecessary intervention | 1 | 1 | 1 | 1 | 1 |
| 3a: Promote labor | Skills and behaviours | Provide nourishment / fluids | 1 | 1 | 1 | 1 | 1 |
| 3a: Promote labor | Skills and behaviours | Provide respectful care | 1 | 1 | 1 | 1 | 1 |
| 3a: Promote labor | Skills and behaviours | Support with pain | 0 | 0 | 0 | 0 | 0 |
| 3a: Promote labor | Skills and behaviours | Use graphic display | 1 | 1 | 1 | 1 | 1 |
| 3b: Manage birth | Knowledge | Evidence about third stage | 1 | 1 | 1 | 1 | 1 |
| 3b: Manage birth | Knowledge | Manage sponteneous vaginal birth | 1 | 1 | 1 | 1 | 1 |
| 3b: Manage birth | Knowledge | Management of emergencies | 1 | 1 | 0 | 0 | 1 |
| 3b: Manage birth | Knowledge | Potential complications / treatment | 1 | 1 | 1 | 0 | 1 |
| 3b: Manage birth | Knowledge | Signs of placental separation | 1 | 1 | 1 | 1 | 1 |
| 3b: Manage birth | Knowledge | Types of trauma requiring repair | 1 | 1 | 0 | 0 | 1 |
| 3b: Manage birth | Skills and behaviours | Assess newborn condition | 1 | 1 | 1 | 1 | 1 |
| 3b: Manage birth | Skills and behaviours | Assess uterine tone / blood loss | 1 | 1 | 1 | 0 | 1 |
| 3b: Manage birth | Skills and behaviours | Coach pushing | 1 | 1 | 0 | 0 | 1 |
| 3b: Manage birth | Skills and behaviours | Delay cord clamping | 1 | 1 | 1 | 1 | 1 |
| 3b: Manage birth | Skills and behaviours | Deliver / inspect placenta | 1 | 1 | 1 | 1 | 1 |
| 3b: Manage birth | Skills and behaviours | Ensure clean / ready environment | 1 | 1 | 1 | 1 | 1 |
| 3b: Manage birth | Skills and behaviours | Expedite birth if fetal distress | 1 | 1 | 1 | 1 | 1 |
| 3b: Manage birth | Skills and behaviours | Inspect for trauma / repair | 1 | 1 | 1 | 1 | 1 |
| 3b: Manage birth | Skills and behaviours | Manage nuchal cord | 0 | 0 | 0 | 0 | 0 |
| 3b: Manage birth | Skills and behaviours | Provide first measures for conditions | 1 | 1 | 1 | 0 | 1 |
| 3b: Manage birth | Skills and behaviours | Provide skin to skin / warmth | 1 | 1 | 1 | 1 | 1 |
| 3b: Manage birth | Skills and behaviours | Refer to continuing treatment | 1 | 1 | 1 | 1 | 1 |
| 3b: Manage birth | Skills and behaviours | Support position of choice | 1 | 1 | 1 | 1 | 1 |
| 3b: Manage birth | Skills and behaviours | Undertake position manoeuvers | 1 | 1 | 0 | 0 | 1 |
| 3c: Newborn care | Knowledge | Appearance of healthy newborn | 1 | 1 | 1 | 1 | 1 |
| 3c: Newborn care | Knowledge | Assessing newborn gestational age | 1 | 1 | 0 | 0 | 1 |
| 3c: Newborn care | Knowledge | Breathing / circulation interventions | 1 | 1 | 1 | 1 | 1 |
| 3c: Newborn care | Knowledge | Needs of small newborns | 1 | 1 | 1 | 1 | 1 |
| 3c: Newborn care | Knowledge | Newborn scoring systems | 1 | 1 | 1 | 1 | 1 |
| 3c: Newborn care | Knowledge | Normal transition | 1 | 1 | 1 | 1 | 1 |
| 3c: Newborn care | Knowledge | Signs indicating immediate action | 1 | 1 | 1 | 1 | 1 |
| 3c: Newborn care | Skills and behaviour | Conduct newborn examination | 1 | 1 | 1 | 1 | 1 |
| 3c: Newborn care | Skills and behaviour | Establish and support breathing | 1 | 1 | 1 | 1 | 1 |
| 3c: Newborn care | Skills and behaviour | Institute newborn prophylaxis | 1 | 1 | 1 | 1 | 1 |
| 3c: Newborn care | Skills and behaviour | Involve partner / support persons | 1 | 1 | 1 | 1 | 1 |
| 3c: Newborn care | Skills and behaviour | Promote maternal care | 1 | 1 | 1 | 1 | 1 |
| 3c: Newborn care | Skills and behaviour | Support initiating breastfeeding | 1 | 1 | 1 | 1 | 1 |
| 3c: Newborn care | Skills and behaviour | Use standardized newborn assessment | 1 | 1 | 1 | 1 | 1 |
|  |  | **Total of indicators** | 49 | 49 | 42 | 38 | 48 |
|  |  | **Coverage of indicators (%)** | 91% | 91% | 78% | 70% | 89% |

# Supplementary Table 2: Survey Results

***Colour Legend:***

- *Blue: Question is included in both surveys (18 questions)*
- *Green: Question is included in only student surveys (11 questions)*
- *Orange: Question is included in only admin surveys (11 questions)*

*Student survey results*

| **Question** | **Response options** | **Survey Response Data** |
| --- | --- | --- |
| **1. Staff Evaluation** |  |  |
| Total number of teachers in your current year of training (in figures) | Number / positive integer | Average of 16, IQR of 9 |
|  |
| How would you rate the skills of the teachers at your school (teaching/at school)? | Highly competent | 26 |  |
| Moderately competent | 4 |  |
| Not competent | 0 |  |
| How would you rate the skills of the supervisors at the internship sites (practical teaching/during internships)? | Highly competent | 23 |  |
| Moderately competent | 7 |  |
| Not competent | 0 |  |
| **2. Infrastructure and Practical Training** |  |  |  |
| Have you done any practical training in healthcare facilities? | Yes | 30 |  |
| No | 0 |  |
| Did you deliver a baby on your own during your practical training? | Yes | 29 |  |
| No | 1 |  |
| Are mannequins used for training at the facility? | Yes | 26 |  |
| No | 4 |  |
| Do you have a learner's notebook/placement book for placements in healthcare facilities, with technical gestures to be validated on the spot? | Yes | 20 |  |
| No | 10 |  |
| If yes, is this notebook used in your evaluation? | Yes | 14 |  |
| No | 13 |  |
| Classroom space for all students | Excellent | 7 |  |
| Satisfactory | 18 |  |
| Not Satisfactory | 5 |  |
| Non-stop electricity | Excellent | 5 |  |
| Satisfactory | 21 |  |
| Not Satisfactory | 4 |  |
| Computer availability | Excellent | 3 |  |
| Satisfactory | 15 |  |
| Not Satisfactory | 12 |  |
| Non-stop Internet availability | Excellent | 4 |  |
| Satisfactory | 17 |  |
| Not Satisfactory | 9 |  |
| Up-to-date library availability | Excellent | 2 |  |
| Satisfactory | 10 |  |
| Not Satisfactory | 18 |  |
| Access to the necessary learning materials | Yes | 21 |  |
| No | 8 |  |
| Access to teaching aids | Yes | 24 |  |
| No | 6 |  |
| Access to skills laboratories | Yes | 14 |  |
| No | 15 |  |
| Availability and quality of skills laboratory material/equipment | Excellent | 1 |  |
| Satisfactory | 12 |  |
| Not Satisfactory | 17 |  |
| Sufficient clinical learning sites | Excellent | 5 |  |
| Satisfactory | 15 |  |
| Not Satisfactory | 10 |  |
| Are there enough activities/patients in the internship site where you are to enable you to practice and master what is taught in class? (Sufficient volume of activities to acquire skills) | Yes | 30 |  |
| No | 0 |  |
| Does the facility where you are currently training have sufficient material and equipment to carry out deliveries in good conditions? (Adequate technical facilities for deliveries) | Yes | 20 |  |
| No | 10 |  |
| **3. Program Administration and Success** |  |  |  |
| What are the entry requirements for your training school? | Open-text short answer | *30 open text responses* |  |
| Do you have any documents on admission procedures? | Yes | 15 |  |
| No | 15 |  |
| Do you have this year's training program? | Yes | 29 |  |
| No | 1 |  |
| Do you think that the curriculum is adapted to the evolution of science? | Yes | 27 |  |
| No | 3 |  |
| How often is knowledge assessed? | Monthly | 1 |  |
| Every three months | 1 |  |
| At the end of teaching of every subject | 28 |  |
| Do you think the program is adapted to your needs? | Yes | 25 |  |
| No | 5 |  |
| Total number of student midwives in your graduating class (in figures) | Number / positive integer | Average of 10, IQR of 6 |  |
| What do you think of your school's success rate? | Excellent | 7 |  |
| Average | 15 |  |
| Poor | 8 |  |
| What other information would you like to share that you think might be useful about your institution? | Open-text short answer | *25 open text responses* |  |

*Administrator survey results*

| **Question** | **Response options** | **Survey Response Data** |
| --- | --- | --- |
| **1. Staff Evaluation** |  |  |
| Total number of midwifery teachers (in figures) | Number / positive integer | Average of 15, IQR of 21 |
| Total number of nursing teachers (in figures) | Number / positive integer | Average of 21, IQR of 21 |
| Teachers have formal preparation for teaching | Yes | 13 |
| No | 2 |
| Do the internship sites have enough competent supervisors to supervise the students (sufficient number and quality/skills of supervisors)? | Yes | 11 |
| No | 4 |
| **2. Infrastructure and Practical Training** |  |  |
| Classroom space for all students | Excellent | 2 |
| Satisfactory | 11 |
| Not Satisfactory | 1 |
| Non-stop electricity | Excellent | 3 |
| Satisfactory | 11 |
| Not Satisfactory | 1 |
| Computer availability | Excellent | 1 |
| Satisfactory | 13 |
| Not Satisfactory | 1 |
| Non-stop Internet availability | Excellent | 0 |
| Satisfactory | 13 |
| Not Satisfactory | 2 |
| Up-to-date library availability | Excellent | 0 |
| Satisfactory | 8 |
| Not Satisfactory | 7 |
| Access to the necessary learning materials | Yes | 14 |
| No | 1 |
| Access to teaching aids | Yes | 15 |
| No | 0 |
| Access to skills laboratories | Yes | 10 |
| No | 5 |
| Availability and quality of skills laboratory material/equipment | Excellent | 1 |
| Satisfactory | 8 |
| Not Satisfactory | 6 |
| Sufficient clinical learning sites | Excellent | 0 |
| Satisfactory | 15 |
| Not Satisfactory | 0 |
| Are there enough activities/patients in the internship site where you are to enable you to practice and master what is taught in class? (Sufficient volume of activities to acquire skills) | Yes | 14 |
| No | 1 |
| Does the facility where you are currently training have sufficient material and equipment to carry out deliveries in good conditions? (Adequate technical facilities for deliveries) | Yes | 12 |
| No | 3 |
| **3. Program Administration and Success** |  |  |
| What are the entry requirements for your training school? | Open-text short answer | *15 open-text responses* |
| Do you have any documents on admission procedures? | Yes | 14 |
| No | 1 |
| Is the training program shared with students? | Yes | 15 |
| No | 0 |
| Are there written policies for students? | Yes | 14 |
| No | 1 |
| Is the course content, both theoretical and practical, aligned with national/international standards? | Yes | 15 |
| No | 0 |
| Do you think that the curriculum is adapted to the evolution of science? | Yes | 15 |
| No | 0 |
| How often is the program revised? | Every year | 4 |
| Every 2 years | 1 |
| Every 3 years | 0 |
| Every 5 years | 3 |
| More than 5 years | 6 |
| Never | 1 |
| Is the program revision based on evidence-based guidelines and best practices? | Yes | 12 |
| No | 3 |
| Do you think the program is adapted to student needs? | Yes | 15 |
| No | 0 |
| Total number of student midwives (in figures) | Number / positive integer | Average of 29, IQR of 25 |
| Total number of nursing students (in figures) | Number / positive integer | Average of 35, IQR of 22 |
| What do you think of your school's success rate?* | Excellent | 2 |
| Average | 8 |
| Poor | 5 |
| What other information would you like to share that you think might be useful about your institution? | Open-text short answer | *14 open-text responses* |

*Categories are defined as: Excellent (more than 70% success rate on annual exams), Average (between 50% and 70% success rate on annual exams), Poor (under 50% success rate on annual exams)

*Largest differences between student and administrator reponses*

On most indicators, school managers and students described the situations relatively similarly, however, managers’ perceptions of schools are often more positive than the students. We compared the percent of students responding “not satisfactory” or “no” to the percent of administrators responding “not satisfactory” or “no” for the 16 questions where data was available for both groups and response options were the same for both groups. The following six questions had the highest difference in responses between these two groups.

| *Question* | *Percent of students responding “not satisfactory” or “no” (N=30)* | *Percent of administrators responding “not satisfactory” or “no” (N=15)* | *Gap between students and administrators* |
| --- | --- | --- | --- |
| Availability of documents on admissions procedures | 50% | 7% | 43% |
| Availability of computers | 40% | 7% | 33% |
| Sufficient clinical learning sites | 33% | 0% | 33% |
| All students have access to the necessary learning materials | 28% | 7% | 21% |
| Access to teaching aids | 20% | 0% | 20% |
| Availability of skills laboratories | 52% | 33% | 18% |

|  |
| --- |
